# Supplementary material
Source: MDPI journal article supplement (https://www.mdpi.com/2227-9717/11/7/1992)
Supplement: s1 [file s1]

## Support Information

**Table S1.** Pore size distribution of fish scale and F/C-Ag composite.

| Sample           | Specific surface area<br>(m <sup>2</sup> /g) | Total pore volume<br>(cm <sup>3</sup> /g) | Pore size<br>(nm) |
|------------------|----------------------------------------------|-------------------------------------------|-------------------|
| Fish scale       | 11.9                                         | 0.02                                      | 13.4              |
| F/C-Ag composite | 45.6                                         | 0.01                                      | 5.1               |
